# Supplementary material for: Mechanical thrombectomy with intra-arterial alteplase provided better functional outcomes for AIS-LVO: a meta-analysis
Source: Frontiers journal article supplement (doi:10.3389/fnins.2023.1137543), 2023-07-06

# Mechanical thrombectomy with intra-arterial alteplase provided better functional outcome for

## AIS-LVO: a meta-analysis from clinical trials

### Supplemental Materials

**Table S1** Search strategy and results

| Database           | Records | Search strategy                                                                                                                                                                                                                                            |
|--------------------|---------|------------------------------------------------------------------------------------------------------------------------------------------------------------------------------------------------------------------------------------------------------------|
| MEDLINE            | 514     | (((((alteplase[Title/Abstract]) OR (recombinant tissue plasminogen activator[Title/Abstract]))) OR (rtPA[Title/Abstract])) OR (tPA[Title/Abstract])) AND (mechanical thrombectomy[Title/Abstract])) AND (stroke[Title/Abstract])                           |
| Embase             | 1511    | ('alteplase'/exp OR alteplase OR 'recombinant tissue plasminogen activator':ab,ti OR rtpa:ab,ti OR tpa:ab,ti) AND 'mechanical thrombectomy':ab,ti AND stroke:ab,ti                                                                                         |
| Cochrane Library   | 66      | alteplase in Title Abstract Keyword AND mechanical thrombectomy in Title Abstract Keyword AND stroke in Title Abstract Keyword - (Word variations have been searched)<br>(alteplase):ti,ab,kw AND (mechanical thrombectomy):ti,ab,kw AND (stroke):ti,ab,kw |
| ClinicalTrials.gov | 45      | alteplase and mechanical thrombectomy   Stroke                                                                                                                                                                                                             |

**Table S2** Inclusion and exclusion criteria, conclusion, data acquisition time and outcome assessments of the included studies

| <b>Trials</b>         | <b>Lin2009</b>                                                                                                                                                                                                      |
|-----------------------|---------------------------------------------------------------------------------------------------------------------------------------------------------------------------------------------------------------------|
| Inclusion Criteria    | Consecutive cases of acute ischemic stroke attributable to TICA occlusions treated endovascularly                                                                                                                   |
| Exclusion Criteria    | Unreported                                                                                                                                                                                                          |
| Efficacy Outcomes     | Recanalization assessed by TIMI.                                                                                                                                                                                    |
| Safety Outcomes       | 1.Parenchymal hemorrhage type 1 and type 2.<br>2.Mortality.                                                                                                                                                         |
| Conclusion            | Combined mechanical and intra-arterial pharmacological therapy is associated with higher recanalization rates than either intervention alone in acute internal carotid artery terminus occlusion revascularization. |
| Data acquisition time | The interventionalists determined the recanalization status at the end of the case.                                                                                                                                 |

| <b>Trials</b>         | <b>Heiferman2017</b>                                                                                                                                                                                                                                                                                                                                                                         |
|-----------------------|----------------------------------------------------------------------------------------------------------------------------------------------------------------------------------------------------------------------------------------------------------------------------------------------------------------------------------------------------------------------------------------------|
| Inclusion Criteria    | Patients who underwent MT for large-vessel occlusion by senior authours.                                                                                                                                                                                                                                                                                                                     |
| Exclusion Criteria    | Unreported                                                                                                                                                                                                                                                                                                                                                                                   |
| Efficacy Outcomes     | Revascularization assessed by mTICI.                                                                                                                                                                                                                                                                                                                                                         |
| Safety Outcomes       | Hemorrhage conversion.                                                                                                                                                                                                                                                                                                                                                                       |
| Conclusion            | Concomitant IA tPA thrombolysis is a safe adjunct to<br>MT treatment of acute LVO with and without concomitant use of IV tPA.<br>Further investigation into the efficacy of this method and optimal use is warranted. With a renewed fervor for interventional treatment of stroke, we must clarify those methods that will lead to best outcomes for this heterogeneous patient population. |
| Data acquisition time | Revascularization was assessed within 24 hours of the procedure by CT and MRI.<br><br>Symptomatic hemorrhages were noted when patients had a decline in neurologic examination.                                                                                                                                                                                                              |

| <b>Trials</b>         | <b>Anadani2018</b>                                                                                                                                           |
|-----------------------|--------------------------------------------------------------------------------------------------------------------------------------------------------------|
| Inclusion Criteria    | Patients in the prospectively maintained thrombectomy dataset who received MT at a large tertiary-care center.                                               |
| Exclusion Criteria    | Unreported.                                                                                                                                                  |
| Efficacy Outcomes     | The functional outcome assessed by mRS and the recanalization rate assessed by mTICI.                                                                        |
| Safety Outcomes       | The rate of hemorrhagic complications, including hemorrhagic transformation and subarachnoid hemorrhage.                                                     |
| Conclusion            | IA-tPA administration during MT was not associated with increased risk of hemorrhage in selected patients with incomplete recanalization after thrombectomy. |
| Data acquisition time | Functional outcomes were assessed at 90 days.<br>Hemorrhagic complications were determined within 72 hours of procedure.                                     |

| <b>Trials</b>         | <b>Yi2018</b>                                                                                                                                                                                                                                                                                                                                                                                                         |
|-----------------------|-----------------------------------------------------------------------------------------------------------------------------------------------------------------------------------------------------------------------------------------------------------------------------------------------------------------------------------------------------------------------------------------------------------------------|
| Inclusion Criteria    | <p>1. acute anterior circulation ischemic stroke due to intracranial large artery embolism occlusion</p> <p>2. Treatment using stent retrieval</p> <p>3. onset-to-presentation time within 8 hours</p> <p>4. age greater than 18 years</p> <p>5. pre-stroke mRS score of 0-1</p>                                                                                                                                      |
| Exclusion Criteria    | The cause of stroke was dissection, Moyamoya disease, vasculitis, tandem occlusion, or intracranial arteriosclerosis.                                                                                                                                                                                                                                                                                                 |
| Efficacy Outcomes     | <p>Neurologic function assessed by mRS at 90 days.</p> <p>Brain tissue reperfusion assessed by mTICI.</p>                                                                                                                                                                                                                                                                                                             |
| Safety Outcomes       | Symptomatic intracranial hemorrhage (sICH), distal embolism, artery re-occlusion, neurologic disability at 90 days, and death.                                                                                                                                                                                                                                                                                        |
| Conclusion            | Relative to the use of a stent retriever alone, the use of a stent retriever combined with intra-arterial rt-PA at the initial pass for mechanical thrombectomy shortens the procedure time, decreases the number of passes of the stent, lowers the likelihood of an embolic event, improves the rate of recanalization with 1 or 2 passes, improves patient prognosis and does not increase the adverse event rate. |
| Data acquisition time | <p>Functional outcomes were assessed at 90 days.</p> <p>Brain tissue reperfusion was assessed immediately after the operation.</p> <p>Symptomatic intracranial hemorrhage was defined within 36 hours after treatment.</p>                                                                                                                                                                                            |

| <b>Trials</b>         | <b>Zaidi2019 (NASA Registry, NCT02239640)</b>                                                                                                                                                                                                                                                                                                                                                                             |
|-----------------------|---------------------------------------------------------------------------------------------------------------------------------------------------------------------------------------------------------------------------------------------------------------------------------------------------------------------------------------------------------------------------------------------------------------------------|
| Inclusion Criteria    | Unreported                                                                                                                                                                                                                                                                                                                                                                                                                |
| Exclusion Criteria    | Unreported                                                                                                                                                                                                                                                                                                                                                                                                                |
| Efficacy Outcomes     | The functional outcome assessed by mRS and the recanalization rate assessed by mTICI.                                                                                                                                                                                                                                                                                                                                     |
| Safety Outcomes       | Symptomatic ICH and mortality.                                                                                                                                                                                                                                                                                                                                                                                            |
| Conclusion            | the use of intraarterial rtPA as RT yielded a similar safety profile, with comparable rates of good functional outcome at 90 days. We recommend that future studies, including large prospective randomized clinical trials, are needed to establish the proper patient population and protocol for intraarterial rtPA administration and to determine if intraarterial rtPA is more advantageous as an adjunctive or RT. |
| Data acquisition time | Recanalization on the angiogram at the end of the procedure.<br>Mortality and mRS at 90 days.<br>Symptomatic ICH on the 24h follow-up head CT.                                                                                                                                                                                                                                                                            |

| <b>Trials</b>         | <b>Zaidi2021 (STRATIS registry, NCT02239640)</b>                                                                                                                                                                                                                                                                                                                             |
|-----------------------|------------------------------------------------------------------------------------------------------------------------------------------------------------------------------------------------------------------------------------------------------------------------------------------------------------------------------------------------------------------------------|
| Inclusion Criteria    | <ol style="list-style-type: none"> <li>1. confirmed, symptomatic intracranial large-vessel occlusion with associated symptoms;</li> <li>2. an NIHSS score of 8 to thirty;</li> <li>3. use of the Medtronic market-released neurothrombectomy device as the initial device;</li> <li>4. premorbid mRS of #1;</li> <li>5. treatment within 8 hours of stroke onset.</li> </ol> |
| Exclusion Criteria    | Unreported                                                                                                                                                                                                                                                                                                                                                                   |
| Efficacy Outcomes     | The functional outcome assessed by mRS, recanalization assessed by mTICI and the mean time of onset to groin puncture.                                                                                                                                                                                                                                                       |
| Safety Outcomes       | The incidence of symptomatic intracranial hemorrhage and mortality.                                                                                                                                                                                                                                                                                                          |
| Conclusion            | Use of intra-arterial rtPA as a rescue therapy after unsuccessful mechanical thrombectomy was not associated with an increased risk of symptomatic intracranial hemorrhage or mortality. Randomized clinical trials are needed to understand the safety and efficacy of intra-arterial thrombolysis as a rescue therapy after mechanical thrombectomy.                       |
| Data acquisition time | MRS at 90 days. Adverse effects up to 90 days post procedure.                                                                                                                                                                                                                                                                                                                |

| <b>Trials</b>         | <b>Renu2022</b>                                                                                                                                                                                                                                                                                                                                                                                                                                                                                                                                                                                                                                                                                                                                                                                  |
|-----------------------|--------------------------------------------------------------------------------------------------------------------------------------------------------------------------------------------------------------------------------------------------------------------------------------------------------------------------------------------------------------------------------------------------------------------------------------------------------------------------------------------------------------------------------------------------------------------------------------------------------------------------------------------------------------------------------------------------------------------------------------------------------------------------------------------------|
| Inclusion Criteria    | <p>1.Participants were aged 18 years or older;</p> <p>2.had a large vessel occlusion in the anterior, middle, or posterior cerebral artery;</p> <p>3. were treated with thrombectomy within 24 hours after the point when they were last seen well;</p> <p>4. had a post thrombectomy eTICI score of 2b50 or greater as judged by local investigators;</p> <p>5. had been able to carry out usual activities in their daily life without support before the stroke.</p>                                                                                                                                                                                                                                                                                                                          |
| Exclusion Criteria    | <p>1.any contraindication to the use of intravenous alteplase per local and national guidelines (except time to therapy)</p> <p>2.a National Institutes of Health Stroke Scale (NIHSS) score on admission of greater than 25, (range, 0-42, with higher values indicating more severe deficit).</p> <p>3.Complete clinical recovery in the angiography suite during the procedure</p>                                                                                                                                                                                                                                                                                                                                                                                                            |
| Efficacy Outcomes     | <p>The proportion of patients with a score of 0 or 1 on the modified Rankin Scale at 90days.</p> <p>The proportion of patients with improved angiographic findings; the infarct expansion ratio of final infarct to initial ischemic tissue volumes; the proportion of patients with an infarct expansion ratio greater than 1; and the infarction volume at 24 to 48 hours after stroke onset.</p> <p>The tertiary efficacy outcomes included the proportion of patients with a Barthel Scale score of 95 to 100 at day 90; the proportion of ischemic worsening (<math>\geq 4</math>-point increase on the NIHSS score) within 48 hours to 72 hours of stroke onset; and quality of life as measured with the EuroQol 5-Dimension 3-Level Self-Report Questionnaire (EQ-5D-3L) at 90 days.</p> |
| Safety Outcomes       | <p>The adverse events measured included incidence of symptomatic intracranial hemorrhage, defined as neurological deterioration (<math>\geq 4</math>-point increase on the NIHSS score) within 24 hours after treatment and evidence of intracranial hemorrhage on imaging studies, and death at 90 days.</p>                                                                                                                                                                                                                                                                                                                                                                                                                                                                                    |
| Conclusion            | <p>Among patients with large vessel occlusion acute ischemic stroke and successful reperfusion following thrombectomy, the use of adjunct intra-arterial alteplase compared with placebo resulted in a greater likelihood of excellent neurological outcome at 90 days. However, because of study limitations, these findings should be interpreted as preliminary and require replication.</p>                                                                                                                                                                                                                                                                                                                                                                                                  |
| Data acquisition time | <p>Clinical assessments were performed at baseline, at 24 hours and 48 hours after randomization, at 5 to 7 days (or at discharge if earlier), and at 90 days.</p> <p>Neurovascular images were assessed at admission, 24 hours and 48 hours.</p> <p>Angiograms were assessed pre-treatment and post-treatment.</p>                                                                                                                                                                                                                                                                                                                                                                                                                                                                              |



**Figure.S1** The pooled OR and 95%CI of subgroup analysis

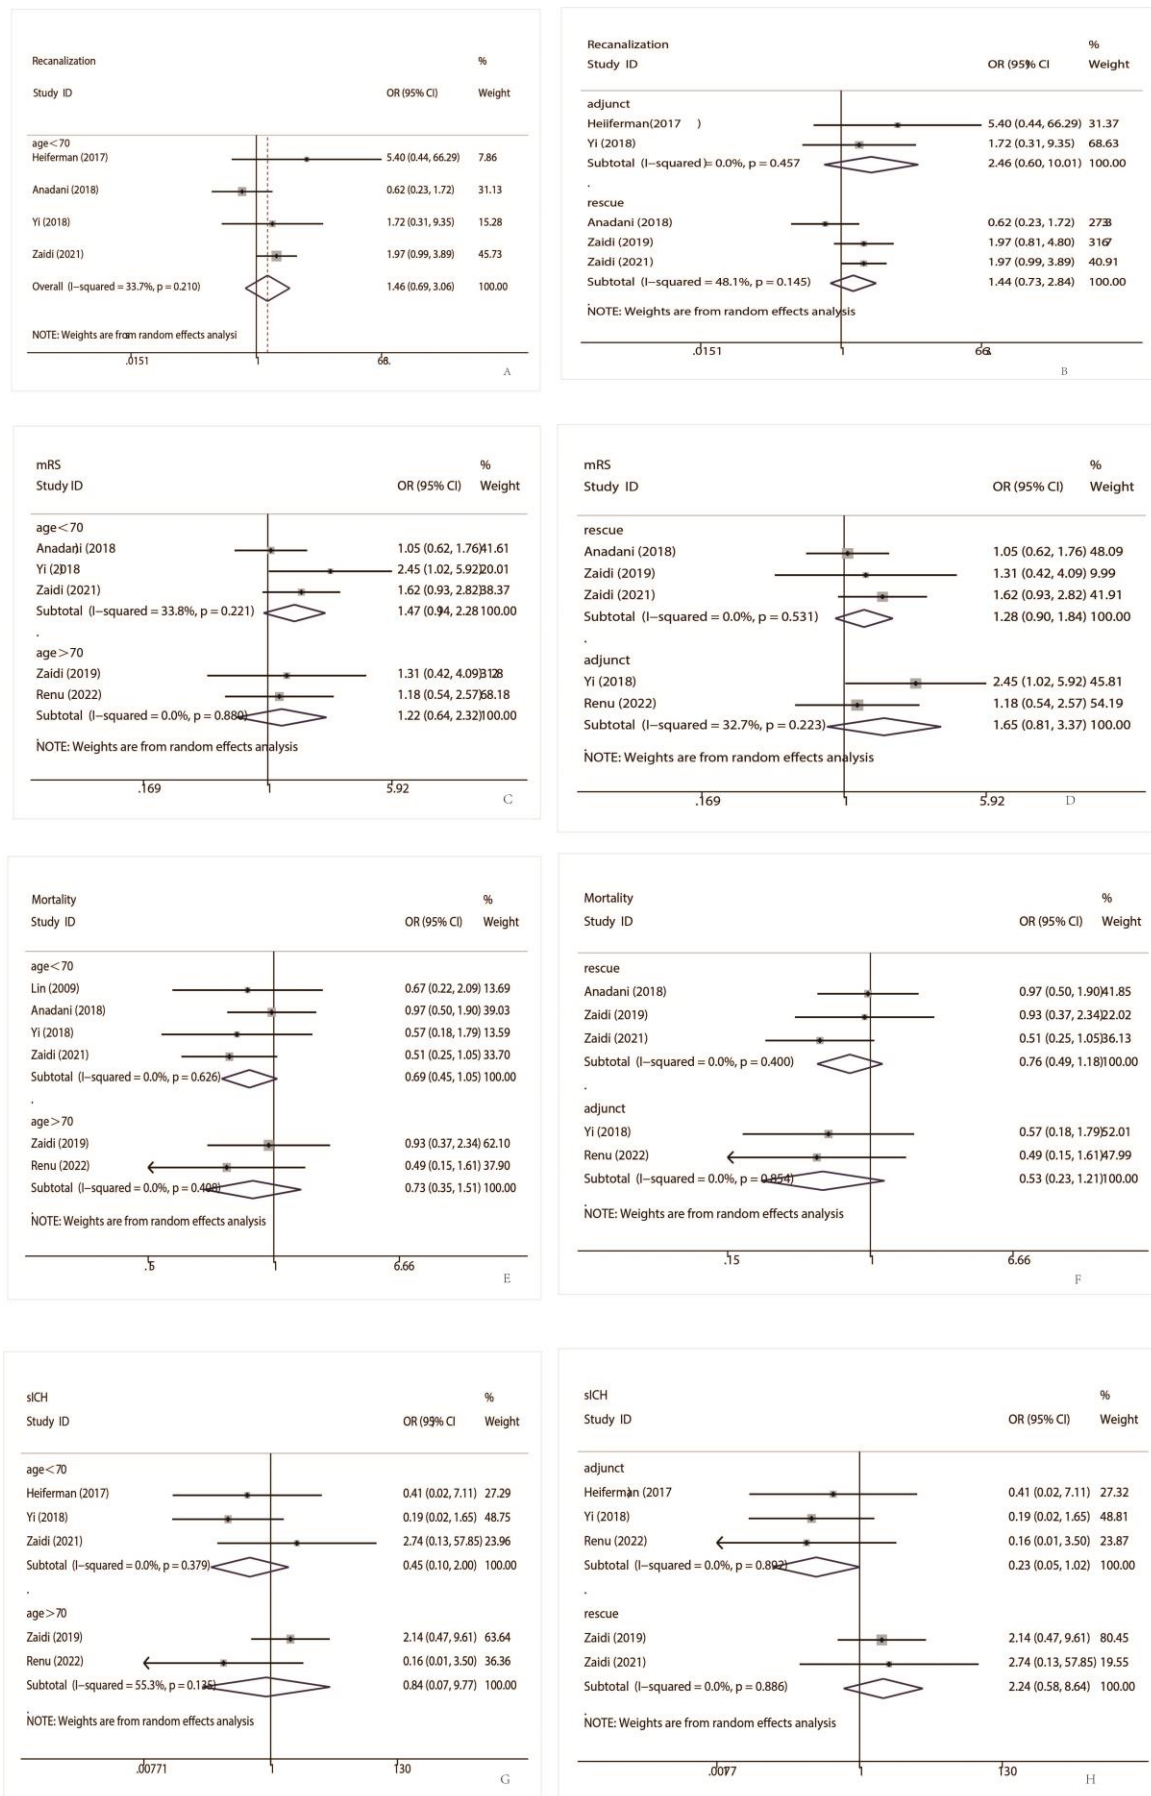

Subgroup analysis of recanalization, mRS, mortality and sICH, according to baseline age and timing of intra-arterial alteplase. A, recanalization of age; B, recanalization of timing; C, mRS of age; D, mRS of timing; E, mortality of age; F, mortality of timing; G, sICH of age; H, sICH of timing.

**Fig.S2** Sensitivity analysis for the subgroup of sICH with age > 70

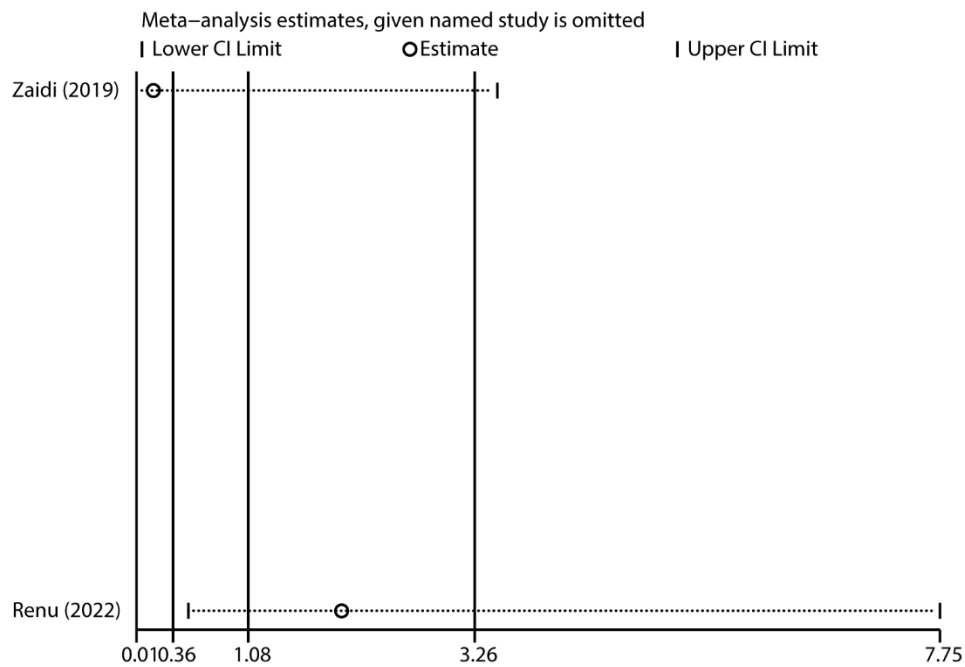

Supplement: Data_Sheet_1.PDF [file Data_Sheet_1.PDF]
